# Supplementary material for: Differential immunophenotype of circulating monocytes from pregnant women in response to viral ligands
Source: Springer Nature journal article supplement (doi:10.1186/s12884-023-05562-0), 2023-05-06
Supplement: MOESM2 [file 25327662]

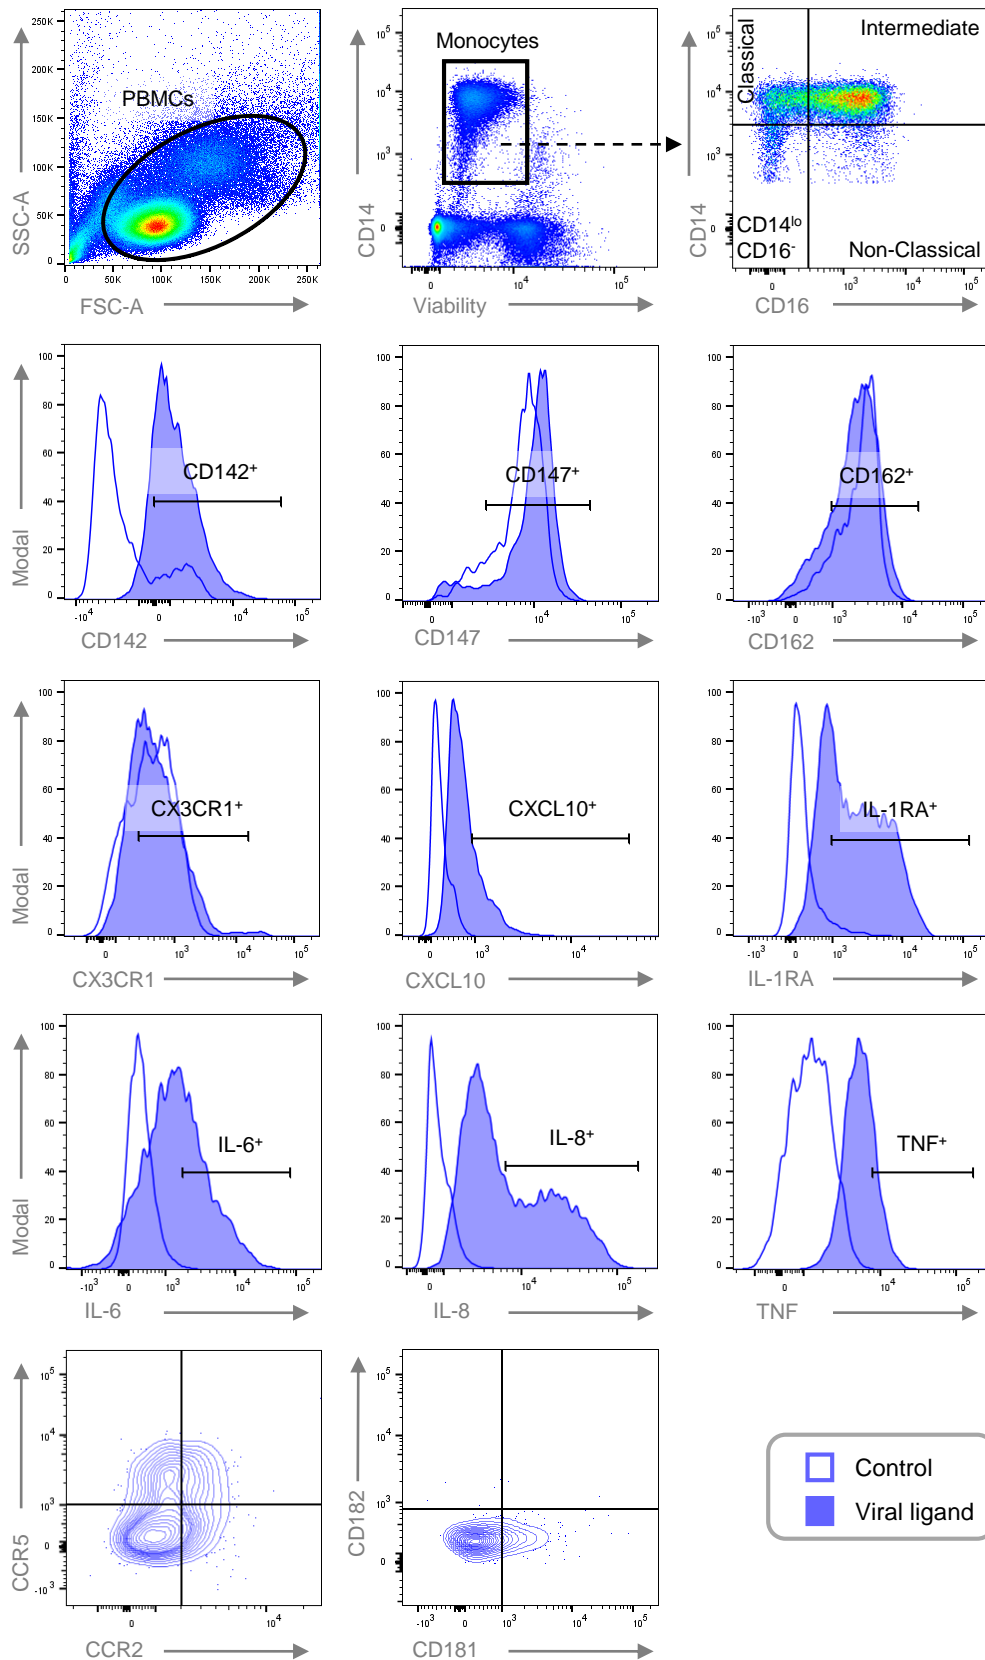

**Supplementary Figure 1. Flow cytometry gating strategy for phenotyping of monocyte subsets upon viral ligand stimulation.** Peripheral blood mononuclear cells (PBMCs) isolated from pregnant (n = 20) and non-pregnant (n = 20) women were gated for monocytes (CD14<sup>+</sup> cells, described in Fig. 1). The expression levels of CD16 and CD14 were used to gate monocyte subsets as follows: classical (CD14<sup>hi</sup>CD16<sup>+</sup>); intermediate (CD14<sup>hi</sup>CD16<sup>+</sup>); non-classical (CD14<sup>lo</sup>CD16<sup>+</sup>); and CD14<sup>lo</sup>CD16<sup>-</sup>. All four subsets as well as the total monocyte population were gated for specific phenotypes after 24 h of viral ligand stimulation (blue filled histograms) or control (blue open histograms).
